# Supplementary figures and images for: Impact of Leavening Agent and Wheat Variety on Bread Organoleptic and Nutritional Quality
Source: MDPI journal article supplement (doi:10.3390/microorganisms10071416), 2022-07-14

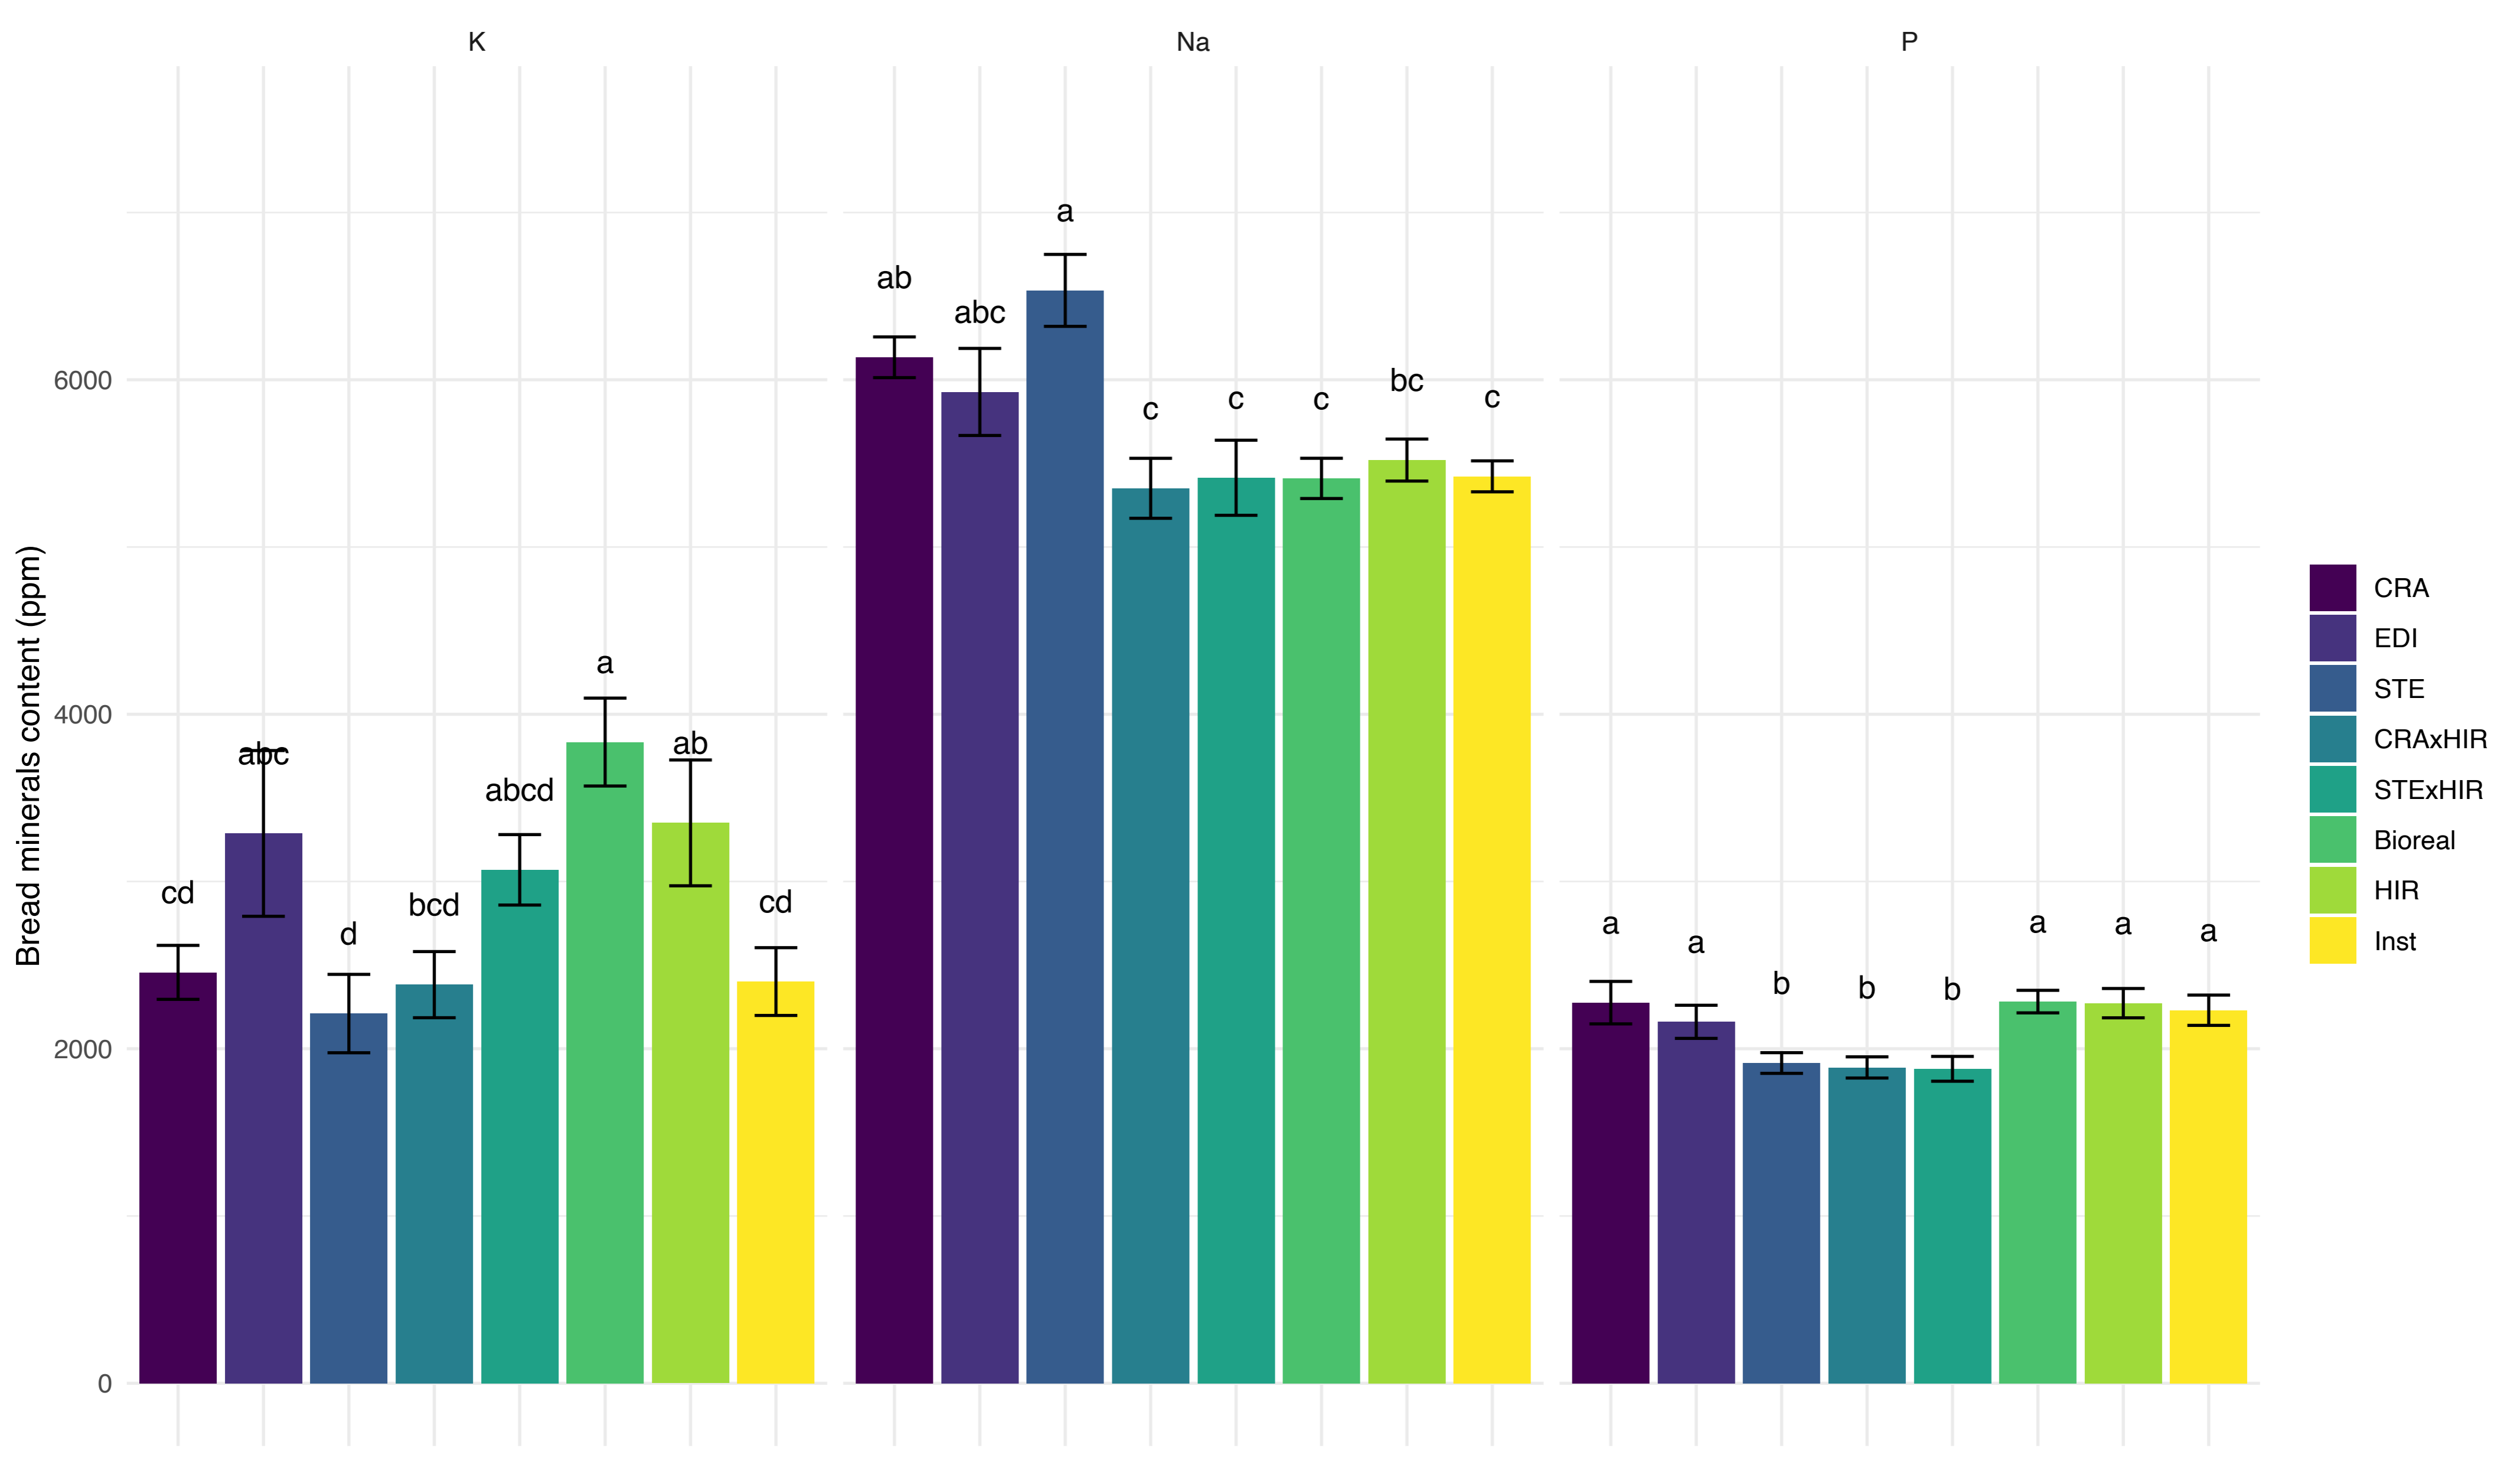

Supplement: s1 [file s1]
